# Supplementary material for: Green synthesis of GeO2/graphene composites as anode material for lithium-ion batteries with high capacity
Source: Royal Society of Chemistry journal article supplement (doi:10.1039/c6ra14819k), 2016-01-01
Supplement: c6ra14819k1.pdf [file c6ra14819k1.pdf]

## Green synthesis of $\text{GeO}_2$ /graphene composites as anode material for Lithium-ion battery with high capacity

Wei Wei,<sup>a, b</sup> Aihua Tian,<sup>a, b</sup> Fangfang Jia<sup>a, b</sup>, Kefeng Wang,<sup>a</sup> Peng Qu<sup>\*a, b</sup> and Maotian Xu<sup>\*a</sup>

<sup>a</sup>School of Chemistry and Chemical Engineering, Shangqiu Normal University, Shangqiu 476000, China, E-mail: qupeng0212@163.com, xumaotian@163.com.

<sup>b</sup>College of Chemistry and Molecular Engineering, Zhengzhou University, Zhengzhou 450001, China

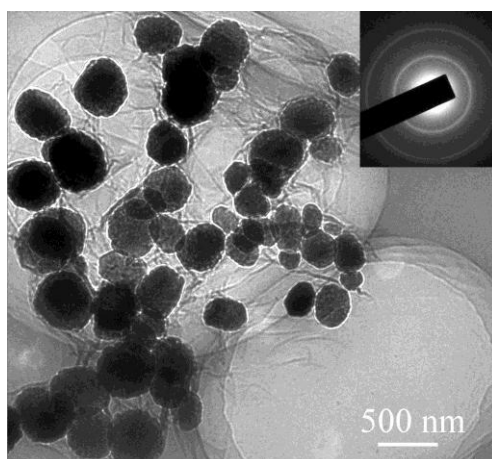

Fig. S1. TEM image and the corresponding SAED patterns (inset) of the  $\text{GeO}_2$ /graphene composites.

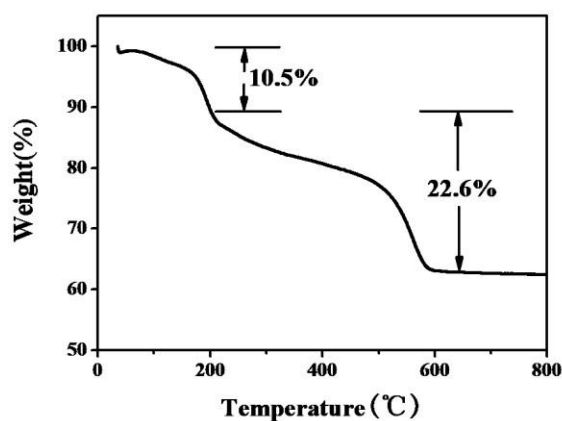

Fig. S2. TGA curves of the as-prepared  $\text{GeO}_2$ /graphene composite.

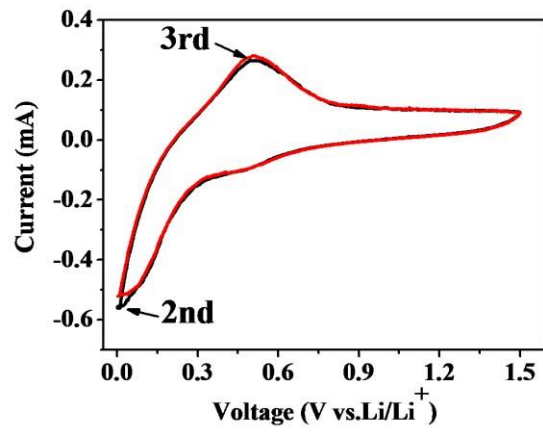

Fig. S3. CV curves of the p-GeO<sub>2</sub> electrode.

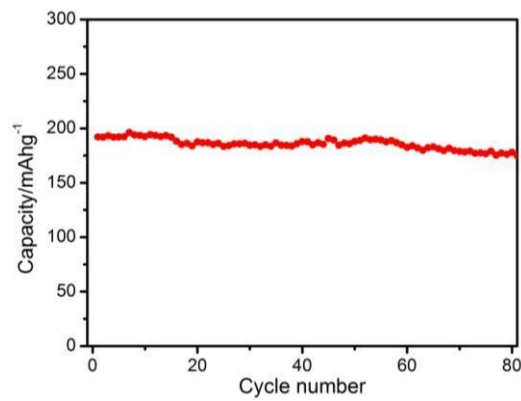

Fig. S4. Cycling performances of the pure graphene at a current density of 100 mA g<sup>-1</sup>.

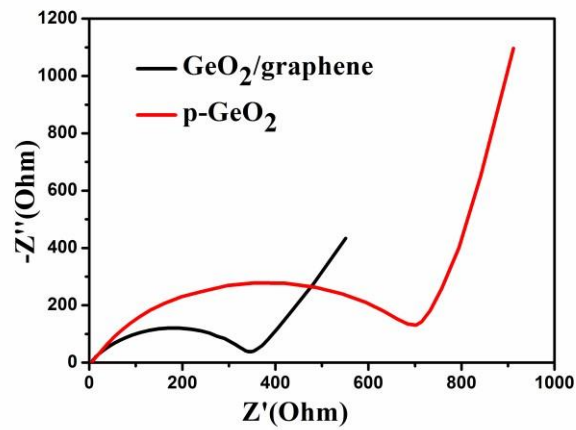

Fig. S5. Electrochemical impedance spectroscopy of p-GeO<sub>2</sub> and GeO<sub>2</sub>/graphene composites electrodes before cycling.
